# Supplementary material for: Activity of PROTAC MDM2 Degrader in Primary Leukemia Cells and PDX models
Source: Research Square preprint supplement (doi:10.21203/rs.3.rs-7982024/v1), 2025-11-11
Supplement: Supplementary file 1 [file 16ac5564fba349bd2138c9df.xlsx]

## Sheet: Table 1
	Table 1. Patient Cohort Characteristics
	Cohort Characteristics		N=108
	Disease	AML	100
		B-ALL	5
		APML	1
		CML	1
		MDS/MPN	1
	Age, median years (IQR)		66 (23)
	Male gender (%)		0.62
	Disease Status at sample collection	New Diagnosis	84
		Relapse/Refractory	16
		Secondary	26
	Cytogenetics, n	Favorable	13
		Intermediate	58
		Adverse	27
		Unknown	10
	WBC (x 109 /L)	>40 × 109/L	40
		>100 × 109/L	10
	Early mortality, n	30-day mortality	18
		90-day mortality	30
	TP53 inactivation		11
