# Supplementary material for: Activity of PROTAC MDM2 Degrader in Primary Leukemia Cells and PDX models
Source: Research Square preprint supplement (doi:10.21203/rs.3.rs-7982024/v1), 2025-11-11
Supplement: Supplementary file 2 [file 9facac2c0c529a10806eac0c.xlsx]

## Sheet: Table 2
		Table 2: TP53 mutational analysis and gene expression of MDM2 and MDM4 in leukemic blasts resistant to MDM2 inhibitor and degrader.
		Sample ID	TP53 status	Expression of MDM2 and MDM4
		AML-689	Exon 5 Y220C	Low
		AML-441	Deletion	High
		AML-926	Exon 7 G245A
		AML-567	Exon 7 D259V
		AML-287	None detected	Low
		AML-220	Exon 3 F113C
		AML-194*	Deletion	Low
		AML-659	Exon 7 D250L
		AML-478	Exon 5 P151S
		AML-78	Exon 1 R65I, Exon 7 R248W
		AML-255	Exon 7 R248G, Exon 8 R273C
		AML-754	Exon 8 D281G
		AML-217	None detected	Low
		AML-913	None detected	Low
		AML-703	None detected	Low
		* Low sensitivity to degrader (IC50 46nM) and resistant to inhibitor
